# Supplementary material
Source: HighWire-hosted journal article supplement (https://bmjopen.bmj.com/content/9/3/e025590)
Supplement: inline-supplementary-material-1 [file inline-supplementary-material-1.pdf]

Supplementary Table 1. Definitions for classification of incident disease outcomes

| Incident disease outcome | Definition                                                                                                                                |
|--------------------------|-------------------------------------------------------------------------------------------------------------------------------------------|
| Myocardial infarction    | ICD 10 codes I21-I23                                                                                                                      |
| Stroke                   | ICD 10 codes I60-I64                                                                                                                      |
| Hypertension             | ICD 10 codes I10, I11 and I15, systolic blood pressure $\geq 140$ mm Hg, diastolic blood pressure $\geq 90$ mm Hg, or physician diagnosis |
| Type 2 diabetes          | ICD 10 codes E11, fasting glucose $\geq 126$ mg/dL, or physician diagnosis                                                                |
| Stomach cancer           | ICD 10 codes C16                                                                                                                          |
| Colon cancer             | ICD 10 codes C18                                                                                                                          |
| Rectum cancer            | ICD 10 codes C20                                                                                                                          |
| Lung cancer              | ICD 10 codes C34                                                                                                                          |
| Liver cancer             | ICD 10 codes C22                                                                                                                          |
| Pancreas cancer          | ICD 10 codes C25                                                                                                                          |
| Head & neck cancer       | ICD 10 codes C00-C06, C09-C14 and C32                                                                                                     |
| Kidney cancer            | ICD 10 codes C64                                                                                                                          |
| Gallbladder cancer       | ICD 10 codes C23                                                                                                                          |
| Esophagus cancer         | ICD 10 codes C15                                                                                                                          |

Abbreviations: ICD – International Classification of Disease

Supplementary Table 2. Participants' characteristics at 1<sup>st</sup>, 2<sup>nd</sup>, 3<sup>rd</sup>, 4<sup>th</sup>, 5<sup>th</sup> and 6<sup>th</sup> repeat-visit

| Repeat visit    | Variables                                                  | All<br>(n=215,295) | Exercise frequency  |                              |                              |                              |                               |
|-----------------|------------------------------------------------------------|--------------------|---------------------|------------------------------|------------------------------|------------------------------|-------------------------------|
|                 |                                                            |                    | None<br>(n=112,156) | 1-2 times/week<br>(n=57,777) | 3-4 times/week<br>(n=25,390) | 5-6 times/week<br>(n= 6,443) | Almost everyday<br>(n=13,529) |
| 1 <sup>st</sup> |                                                            |                    |                     |                              |                              |                              |                               |
|                 | Sex, %                                                     |                    |                     |                              |                              |                              |                               |
|                 | Men                                                        | 51.1%              | 45.0%               | 61.8%                        | 55.3%                        | 50.6%                        | 48.8%                         |
|                 | Women                                                      | 48.9%              | 55.0%               | 38.2%                        | 44.7%                        | 49.4%                        | 51.2%                         |
|                 | Age, years                                                 | 52.7 (8.6)         | 53.6 (9.2)          | 50.9 (7.4)                   | 51.3 (7.5)                   | 52.3 (8.0)                   | 55.6 (9.1)                    |
|                 | Body Mass Index, kg <sup>2</sup> /m                        | 23.5 (2.8)         | 23.4 (2.9)          | 23.6 (2.7)                   | 23.7 (2.6)                   | 23.6 (2.6)                   | 23.7 (2.7)                    |
|                 | Systolic blood pressure, mm Hg                             | 120.5 (14.4)       | 120.6 (14.7)        | 120.4 (13.9)                 | 120.0 (13.9)                 | 119.6 (13.9)                 | 121.4 (14.6)                  |
|                 | Diastolic blood pressure, mm Hg                            | 75.7 (9.9)         | 75.6 (9.9)          | 75.9 (9.8)                   | 75.5 (9.8)                   | 75.2 (9.8)                   | 75.7 (9.8)                    |
|                 | Fasting glucose levels, mg/dL                              | 92.6 (18.5)        | 92.6 (18.8)         | 92.7 (17.4)                  | 92.4 (17.8)                  | 92.8 (21.0)                  | 93.3 (20.2)                   |
|                 | Total cholesterol, mg/dL                                   | 197.3 (36.2)       | 197.0 (36.8)        | 197.3 (35.6)                 | 197.9 (35.1)                 | 197.4 (35.9)                 | 197.8 (36.7)                  |
|                 | Family history of heart disease, stroke or hypertension, % | 12.6%              | 10.7%               | 14.2%                        | 16.7%                        | 16.7%                        | 12.0%                         |
|                 | Family history of cancer, %                                | 14.3%              | 12.7%               | 15.5%                        | 17.4%                        | 19.2%                        | 14.5%                         |
|                 | Family history of diabetes, %                              | 6.0%               | 5.0%                | 6.7%                         | 8.2%                         | 9.0%                         | 5.8%                          |
|                 | Smoking status, %                                          |                    |                     |                              |                              |                              |                               |
|                 | Never                                                      | 70.7%              | 74.8%               | 62.4%                        | 68.9%                        | 71.7%                        | 74.8%                         |
|                 | Previously                                                 | 8.6%               | 5.8%                | 11.9%                        | 12.4%                        | 11.9%                        | 8.8%                          |
|                 | Currently                                                  | 20.8%              | 19.4%               | 25.7%                        | 18.7%                        | 16.3%                        | 16.4%                         |
|                 | Alcohol Consumption, %                                     |                    |                     |                              |                              |                              |                               |
|                 | Never                                                      | 59.8%              | 66.9%               | 49.2%                        | 52.7%                        | 54.9%                        | 61.8%                         |
|                 | 2-3 times/month                                            | 15.6%              | 12.7%               | 20.5%                        | 18.6%                        | 18.2%                        | 12.8%                         |
|                 | 1-2 times/week                                             | 15.8%              | 11.8%               | 21.7%                        | 19.9%                        | 17.0%                        | 14.8%                         |
|                 | ≥3 times/week                                              | 8.8%               | 8.7%                | 8.6%                         | 8.7%                         | 10.0%                        | 10.6%                         |

Supplementary Table 2. Participants' characteristics at 1<sup>st</sup>, 2<sup>nd</sup>, 3<sup>rd</sup>, 4<sup>th</sup>, 5<sup>th</sup> and 6<sup>th</sup> repeat-visit (cont.)

| Repeat visit<br>2 <sup>nd</sup> | Variables                                                  | All<br>(n=150,845) | Exercise frequency |                              |                              |                             |                               |
|---------------------------------|------------------------------------------------------------|--------------------|--------------------|------------------------------|------------------------------|-----------------------------|-------------------------------|
|                                 |                                                            |                    | None<br>(n=73,660) | 1-2 times/week<br>(n=44,211) | 3-4 times/week<br>(n=19,593) | 5-6 times/week<br>(n=4,771) | Almost everyday<br>(n= 8,610) |
|                                 | Sex, %                                                     |                    |                    |                              |                              |                             |                               |
|                                 | Men                                                        | 54.2%              | 47.0%              | 64.6%                        | 57.9%                        | 53.8%                       | 53.5%                         |
|                                 | Women                                                      | 45.8%              | 53.0%              | 35.4%                        | 42.1%                        | 46.2%                       | 46.5%                         |
|                                 | Age, years                                                 | 53.3 (8.3)         | 54.2 (8.9)         | 51.7 (7.2)                   | 52.3 (7.4)                   | 53.4 (7.8)                  | 56.5 (9.1)                    |
|                                 | Body Mass Index, kg <sup>2</sup> /m                        | 23.5 (2.7)         | 23.4 (2.8)         | 23.6 (2.6)                   | 23.7 (2.6)                   | 23.6 (2.6)                  | 23.6 (2.7)                    |
|                                 | Systolic blood pressure, mm Hg                             | 120.9 (14.1)       | 121.0 (14.5)       | 120.7 (13.7)                 | 120.4 (13.6)                 | 120.3 (13.7)                | 122.0 (14.5)                  |
|                                 | Diastolic blood pressure, mm Hg                            | 75.8 (9.6)         | 75.8 (9.7)         | 76.0 (9.5)                   | 75.5 (9.4)                   | 75.4 (9.4)                  | 76.0 (9.8)                    |
|                                 | Fasting glucose levels, mg/dL                              | 93.2 (16.9)        | 93.1 (17.4)        | 93.5 (17.0)                  | 93.1 (15.5)                  | 93.5 (15.9)                 | 93.7 (16.2)                   |
|                                 | Total cholesterol, mg/dL                                   | 197.6 (35.9)       | 197.7 (36.5)       | 197.4 (35.4)                 | 197.8 (35.2)                 | 196.7 (34.9)                | 198.1 (36.5)                  |
|                                 | Family history of heart disease, stroke or hypertension, % | 13.4%              | 11.2%              | 14.6%                        | 17.5%                        | 18.3%                       | 13.1%                         |
|                                 | Family history of cancer, %                                | 14.9%              | 12.9%              | 16.4%                        | 17.4%                        | 19.7%                       | 15.4%                         |
|                                 | Family history of diabetes, %                              | 6.3%               | 5.2%               | 7.1%                         | 8.2%                         | 9.0%                        | 6.1%                          |
|                                 | Smoking status, %                                          |                    |                    |                              |                              |                             |                               |
|                                 | Never                                                      | 71.0%              | 76.5%              | 62.3%                        | 68.7%                        | 71.2%                       | 74.2%                         |
|                                 | Previously                                                 | 9.0%               | 5.5%               | 12.5%                        | 13.1%                        | 13.1%                       | 9.4%                          |
|                                 | Currently                                                  | 20.0%              | 18.0%              | 25.3%                        | 18.2%                        | 15.8%                       | 16.5%                         |
|                                 | Alcohol Consumption, %                                     |                    |                    |                              |                              |                             |                               |
|                                 | Never                                                      | 59.0%              | 67.6%              | 48.1%                        | 51.9%                        | 54.1%                       | 60.0%                         |
|                                 | 2-3 times/month                                            | 16.1%              | 12.6%              | 20.9%                        | 19.0%                        | 18.9%                       | 13.6%                         |
|                                 | 1-2 times/week                                             | 16.7%              | 12.1%              | 22.8%                        | 20.7%                        | 17.5%                       | 15.8%                         |
|                                 | ≥3 times/week                                              | 8.1%               | 7.8%               | 8.2%                         | 8.3%                         | 9.5%                        | 10.7%                         |

Supplementary Table 2. Participants' characteristics at 1<sup>st</sup>, 2<sup>nd</sup>, 3<sup>rd</sup>, 4<sup>th</sup>, 5<sup>th</sup> and 6<sup>th</sup> repeat-visit (cont.)

| Repeat visit    | Variables                                                  | All<br>(n=80,639) | Exercise frequency  |                              |                              |                             |                              |
|-----------------|------------------------------------------------------------|-------------------|---------------------|------------------------------|------------------------------|-----------------------------|------------------------------|
|                 |                                                            |                   | None<br>(n= 36,123) | 1-2 times/week<br>(n=26,505) | 3-4 times/week<br>(n=11,432) | 5-6 times/week<br>(n=2,391) | Almost everyday<br>(n=4,188) |
| 3 <sup>rd</sup> | Sex, %                                                     |                   |                     |                              |                              |                             |                              |
|                 | Men                                                        | 63.1%             | 53.9%               | 73.0%                        | 68.6%                        | 64.5%                       | 63.4%                        |
|                 | Women                                                      | 36.9%             | 46.1%               | 27.0%                        | 31.4%                        | 35.6%                       | 36.7%                        |
|                 | Age, years                                                 | 52.3 (7.2)        | 52.9 (7.8)          | 51.2 (6.2)                   | 51.9 (6.6)                   | 52.8 (7.0)                  | 55.2 (8.4)                   |
|                 | Body Mass Index, kg <sup>2</sup> /m                        | 23.5 (2.7)        | 23.3 (2.8)          | 23.6 (2.6)                   | 23.7 (2.5)                   | 23.7 (2.6)                  | 23.7 (2.7)                   |
|                 | Systolic blood pressure, mm Hg                             | 121.1 (13.6)      | 120.9 (13.9)        | 120.9 (13.4)                 | 121.0 (13.2)                 | 120.6 (13.3)                | 122.0 (14.0)                 |
|                 | Diastolic blood pressure, mm Hg                            | 76.1 (9.4)        | 76.0 (9.5)          | 76.4 (9.4)                   | 76.1 (9.1)                   | 75.6 (9.5)                  | 76.3 (9.6)                   |
|                 | Fasting glucose levels, mg/dL                              | 93.7 (16.8)       | 93.3 (17.1)         | 94.1 (16.7)                  | 93.9 (15.9)                  | 94.1 (16.5)                 | 94.5 (17.0)                  |
|                 | Total cholesterol, mg/dL                                   | 197.1 (35.2)      | 197.1 (35.5)        | 197.4 (34.8)                 | 196.9 (34.7)                 | 196.5 (35.2)                | 196.7 (35.4)                 |
|                 | Family history of heart disease, stroke or hypertension, % | 13.5%             | 11.4%               | 14.8%                        | 16.7%                        | 18.6%                       | 11.7%                        |
|                 | Family history of cancer, %                                | 14.8%             | 13.0%               | 15.8%                        | 17.8%                        | 18.9%                       | 14.7%                        |
|                 | Family history of diabetes, %                              | 6.4%              | 5.3%                | 7.0%                         | 8.0%                         | 9.5%                        | 6.2%                         |
|                 | Smoking status, %                                          |                   |                     |                              |                              |                             |                              |
|                 | Never                                                      | 66.6%             | 73.8%               | 57.6%                        | 63.9%                        | 65.5%                       | 68.8%                        |
|                 | Previously                                                 | 10.7%             | 6.1%                | 14.0%                        | 15.5%                        | 16.6%                       | 12.4%                        |
|                 | Currently                                                  | 22.8%             | 20.2%               | 28.4%                        | 20.6%                        | 17.9%                       | 18.7%                        |
|                 | Alcohol Consumption, %                                     |                   |                     |                              |                              |                             |                              |
|                 | Never                                                      | 53.6%             | 64.2%               | 42.5%                        | 47.2%                        | 47.4%                       | 53.9%                        |
|                 | 2-3 times/month                                            | 18.5%             | 14.0%               | 23.7%                        | 20.8%                        | 21.4%                       | 15.8%                        |
|                 | 1-2 times/week                                             | 19.5%             | 14.0%               | 25.6 %                       | 22.8%                        | 20.7%                       | 18.8%                        |
|                 | ≥3 times/week                                              | 8.4%              | 7.8%                | 8.3%                         | 9.2%                         | 10.5%                       | 11.5%                        |

Supplementary Table 2. Participants' characteristics at 1<sup>st</sup>, 2<sup>nd</sup>, 3<sup>rd</sup>, 4<sup>th</sup>, 5<sup>th</sup> and 6<sup>th</sup> repeat-visit (cont.)

| Repeat visit<br>4 <sup>th</sup> | Variables                                                  | All<br>(n=40,910) | Exercise frequency |                              |                              |                             |                              |
|---------------------------------|------------------------------------------------------------|-------------------|--------------------|------------------------------|------------------------------|-----------------------------|------------------------------|
|                                 |                                                            |                   | None<br>(n=17,678) | 1-2 times/week<br>(n=14,624) | 3-4 times/week<br>(n= 5,685) | 5-6 times/week<br>(n=1,094) | Almost everyday<br>(n=1,829) |
|                                 | Sex, %                                                     |                   |                    |                              |                              |                             |                              |
|                                 | Men                                                        | 72.3%             | 61.6%              | 81.1%                        | 81.5%                        | 78.2%                       | 73.9%                        |
|                                 | Women                                                      | 27.7%             | 38.4%              | 18.9%                        | 18.5%                        | 21.9%                       | 26.1%                        |
|                                 | Age, years                                                 | 50.9 (5.4)        | 51.2 (5.5)         | 50.6 (5.1)                   | 50.7 (5.3)                   | 51.0 (5.6)                  | 52.6 (6.3)                   |
|                                 | Body Mass Index, kg <sup>2</sup> /m                        | 23.5 (2.7)        | 23.3 (2.7)         | 23.7 (2.6)                   | 23.8 (2.6)                   | 23.8 (2.5)                  | 23.7 (2.6)                   |
|                                 | Systolic blood pressure, mm Hg                             | 121.4 (13.3)      | 120.9 (13.5)       | 121.7 (13.0)                 | 121.5 (12.8)                 | 121.5 (13.1)                | 122.7 (13.6)                 |
|                                 | Diastolic blood pressure, mm Hg                            | 76.6 (9.2)        | 76.2 (9.3)         | 77.0 (9.2)                   | 76.8 (8.9)                   | 76.8 (9.4)                  | 77.2 (9.5)                   |
|                                 | Fasting glucose levels, mg/dL                              | 93.9 (17.8)       | 93.3 (17.9)        | 94.4 (17.9)                  | 94.3 (17.1)                  | 94.0 (16.0)                 | 94.9 (18.8)                  |
|                                 | Total cholesterol, mg/dL                                   | 196.8 (35.0)      | 197.2 (35.5)       | 196.7 (34.6)                 | 196.6 (34.2)                 | 195.0 (34.3)                | 196.5 (34.9)                 |
|                                 | Family history of heart disease, stroke or hypertension, % | 12.3%             | 10.4%              | 13.7%                        | 14.2%                        | 16.3%                       | 11.6%                        |
|                                 | Family history of cancer, %                                | 13.8%             | 12.6%              | 14.7%                        | 15.0%                        | 16.3%                       | 13.5%                        |
|                                 | Family history of diabetes, %                              | 5.7%              | 4.8%               | 6.2%                         | 6.9%                         | 7.5%                        | 6.7%                         |
|                                 | Smoking status, %                                          |                   |                    |                              |                              |                             |                              |
|                                 | Never                                                      | 60.6%             | 69.5%              | 51.9%                        | 55.5%                        | 57.3%                       | 62.0%                        |
|                                 | Previously                                                 | 12.2%             | 6.9%               | 15.1%                        | 18.7%                        | 18.7%                       | 15.7%                        |
|                                 | Currently                                                  | 27.2%             | 23.7%              | 33.0%                        | 25.8%                        | 24.0%                       | 22.4%                        |
|                                 | Alcohol Consumption, %                                     |                   |                    |                              |                              |                             |                              |
|                                 | Never                                                      | 48.1%             | 60.0%              | 38.0%                        | 39.1%                        | 39.9%                       | 45.4%                        |
|                                 | 2-3 times/month                                            | 20.5%             | 15.5%              | 24.9%                        | 24.3%                        | 24.0%                       | 19.7%                        |
|                                 | 1-2 times/week                                             | 22.4%             | 16.2%              | 28.4%                        | 26.3%                        | 22.6%                       | 22.9%                        |
|                                 | ≥3 times/week                                              | 9.0%              | 8.2%               | 8.7%                         | 10.3%                        | 13.6%                       | 12.0%                        |

Supplementary Table 2. Participants' characteristics at 1<sup>st</sup>, 2<sup>nd</sup>, 3<sup>rd</sup>, 4<sup>th</sup>, 5<sup>th</sup> and 6<sup>th</sup> repeat-visit (cont.)

| Repeat visit    | Variables                                                  | All<br>(n= 26,356) | Exercise frequency |                             |                             |                           |                              |
|-----------------|------------------------------------------------------------|--------------------|--------------------|-----------------------------|-----------------------------|---------------------------|------------------------------|
|                 |                                                            |                    | None<br>(n=10,771) | 1-2 times/week<br>(n=9,807) | 3-4 times/week<br>(n=3,884) | 5-6 times/week<br>(n=724) | Almost everyday<br>(n=1,170) |
| 5 <sup>th</sup> | Sex, %                                                     |                    |                    |                             |                             |                           |                              |
|                 | Men                                                        | 73.7%              | 62.6%              | 81.6%                       | 82.4%                       | 81.2%                     | 76.9%                        |
|                 | Women                                                      | 26.3%              | 37.4%              | 18.4%                       | 17.6%                       | 18.8%                     | 23.0%                        |
|                 | Age, years                                                 | 51.1 (4.9)         | 51.4 (5.1)         | 50.8 (4.7)                  | 51.0 (4.7)                  | 51.4 (5.0)                | 52.1 (5.6)                   |
|                 | Body Mass Index, kg <sup>2</sup> /m                        | 23.5 (2.6)         | 23.3 (2.7)         | 23.7 (2.6)                  | 23.8 (2.4)                  | 23.7 (2.5)                | 23.8 (2.6)                   |
|                 | Systolic blood pressure, mm Hg                             | 121.4 (13.0)       | 121.0 (13.4)       | 121.8 (12.9)                | 121.6 (12.6)                | 120.8 (12.9)              | 121.5 (12.7)                 |
|                 | Diastolic blood pressure, mm Hg                            | 76.6 (9.1)         | 76.2 (9.1)         | 77.1 (9.0)                  | 76.8 (8.8)                  | 76.7 (8.6)                | 76.4 (9.0)                   |
|                 | Fasting glucose levels, mg/dL                              | 94.3 (17.6)        | 93.7 (18.1)        | 94.6 (17.3)                 | 94.7 (16.6)                 | 94.6 (15.9)               | 95.4 (18.7)                  |
|                 | Total cholesterol, mg/dL                                   | 197.1 (34.5)       | 197.7 (34.8)       | 196.7 (34.2)                | 196.4 (33.8)                | 195.2 (34.2)              | 198.2 (37.0)                 |
|                 | Family history of heart disease, stroke or hypertension, % | 12.6%              | 11.3%              | 13.4%                       | 14.3%                       | 13.8%                     | 10.9%                        |
|                 | Family history of cancer, %                                | 14.3%              | 13.2%              | 15.1%                       | 14.9%                       | 17.8%                     | 13.5%                        |
|                 | Family history of diabetes, %                              | 5.9%               | 4.9%               | 6.4%                        | 6.7%                        | 7.2%                      | 8.6%                         |
|                 | Smoking status, %                                          |                    |                    |                             |                             |                           |                              |
|                 | Never                                                      | 58.9%              | 68.1%              | 50.8%                       | 54.4%                       | 57.0%                     | 58.5%                        |
|                 | Previously                                                 | 13.1%              | 7.1%               | 16.0%                       | 19.3%                       | 19.8%                     | 19.7%                        |
|                 | Currently                                                  | 28.0%              | 24.8%              | 33.2%                       | 26.2%                       | 23.2%                     | 21.9%                        |
|                 | Alcohol Consumption, %                                     |                    |                    |                             |                             |                           |                              |
|                 | Never                                                      | 46.3%              | 57.9%              | 37.6%                       | 38.3%                       | 41.3%                     | 42.9%                        |
|                 | 2-3 times/month                                            | 21.7%              | 16.7%              | 25.8%                       | 24.7%                       | 22.2%                     | 22.3%                        |
|                 | 1-2 times/week                                             | 23.4%              | 17.4%              | 28.0%                       | 27.3%                       | 26.0%                     | 25.0%                        |
|                 | ≥3 times/week                                              | 8.6%               | 8.1%               | 8.5%                        | 9.8%                        | 10.5%                     | 9.7%                         |

Supplementary Table 2. Participants' characteristics at 1<sup>st</sup>, 2<sup>nd</sup>, 3<sup>rd</sup>, 4<sup>th</sup>, 5<sup>th</sup> and 6<sup>th</sup> repeat-visit (cont.)

| Repeat visit<br>6 <sup>th</sup> | Variables                                                  | All<br>(n= 12,302) | Exercise frequency |                             |                             |                           |                            |
|---------------------------------|------------------------------------------------------------|--------------------|--------------------|-----------------------------|-----------------------------|---------------------------|----------------------------|
|                                 |                                                            |                    | None<br>(n= 4,684) | 1-2 times/week<br>(n=4,754) | 3-4 times/week<br>(n=1,929) | 5-6 times/week<br>(n=358) | Almost everyday<br>(n=577) |
|                                 | Sex, %                                                     |                    |                    |                             |                             |                           |                            |
|                                 | Men                                                        | 76.2%              | 64.2%              | 83.8%                       | 84.7%                       | 80.7%                     | 80.4%                      |
|                                 | Women                                                      | 23.8%              | 35.8%              | 16.2%                       | 15.3%                       | 19.3%                     | 19.6%                      |
|                                 | Age, years                                                 | 51.3 (4.5)         | 51.6 (4.7)         | 51.0 (4.2)                  | 51.0 (4.4)                  | 51.2 (4.3)                | 52.0 (5.1)                 |
|                                 | Body Mass Index, kg <sup>2</sup> /m                        | 23.6 (2.6)         | 23.3 (2.7)         | 23.7 (2.6)                  | 23.8 (2.4)                  | 23.6 (2.2)                | 23.7 (2.5)                 |
|                                 | Systolic blood pressure, mm Hg                             | 121.5 (12.8)       | 121.2 (13.0)       | 121.6 (12.6)                | 121.7 (12.6)                | 121.0 (12.5)              | 122.1 (12.3)               |
|                                 | Diastolic blood pressure, mm Hg                            | 76.7 (9.0)         | 76.4 (9.0)         | 77.0 (8.9)                  | 77.0 (9.0)                  | 76.0 (8.7)                | 76.3 (9.0)                 |
|                                 | Fasting glucose levels, mg/dL                              | 94.6 (18.5)        | 93.7 (18.8)        | 95.1 (18.7)                 | 94.9 (16.6)                 | 95.1 (18.4)               | 95.7 (20.1)                |
|                                 | Total cholesterol, mg/dL                                   | 197.1 (34.5)       | 197.9 (35.0)       | 197.1 (34.2)                | 195.8 (34.3)                | 192.0 (32.2)              | 197.4 (34.3)               |
|                                 | Family history of heart disease, stroke or hypertension, % | 13.2%              | 11.7%              | 13.7%                       | 15.5%                       | 14.3%                     | 12.7%                      |
|                                 | Family history of cancer, %                                | 14.5%              | 12.9%              | 15.5%                       | 15.7%                       | 15.1%                     | 14.9%                      |
|                                 | Family history of diabetes, %                              | 6.4%               | 5.5%               | 6.4%                        | 7.3%                        | 7.3%                      | 9.5%                       |
|                                 | Smoking status, %                                          |                    |                    |                             |                             |                           |                            |
|                                 | Never                                                      | 56.9%              | 66.6%              | 48.7%                       | 53.6%                       | 57.3%                     | 57.4%                      |
|                                 | Previously                                                 | 14.0%              | 7.0%               | 17.3%                       | 20.4%                       | 16.8%                     | 21.1%                      |
|                                 | Currently                                                  | 29.1%              | 26.5%              | 34.1%                       | 26.0%                       | 26.0%                     | 21.5%                      |
|                                 | Alcohol Consumption, %                                     |                    |                    |                             |                             |                           |                            |
|                                 | Never                                                      | 43.7%              | 56.5%              | 35.0%                       | 36.4%                       | 40.5%                     | 37.8%                      |
|                                 | 2-3 times/month                                            | 22.8%              | 17.0%              | 27.2%                       | 24.9%                       | 24.6%                     | 24.8%                      |
|                                 | 1-2 times/week                                             | 24.8%              | 17.6%              | 30.0%                       | 28.3%                       | 26.5%                     | 27.4%                      |
|                                 | ≥3 times/week                                              | 8.8%               | 8.8%               | 7.9%                        | 10.4%                       | 8.4%                      | 10.1%                      |

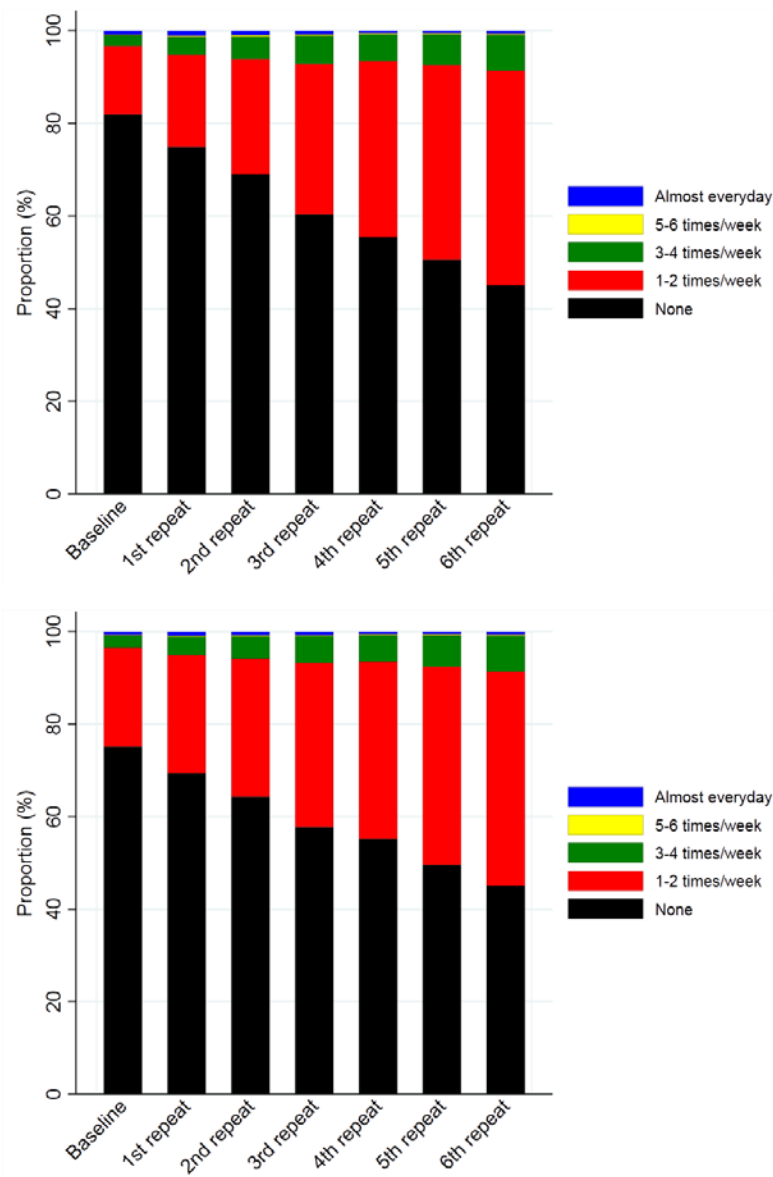

Supplementary Figure 1. Changes in proportions of exercise frequency categories across 7 time points in all 257,854 individuals who provided data at each respective assessment visit (top panel), and 12,302 individuals who provided data from all 7 assessment visits (bottom panel).



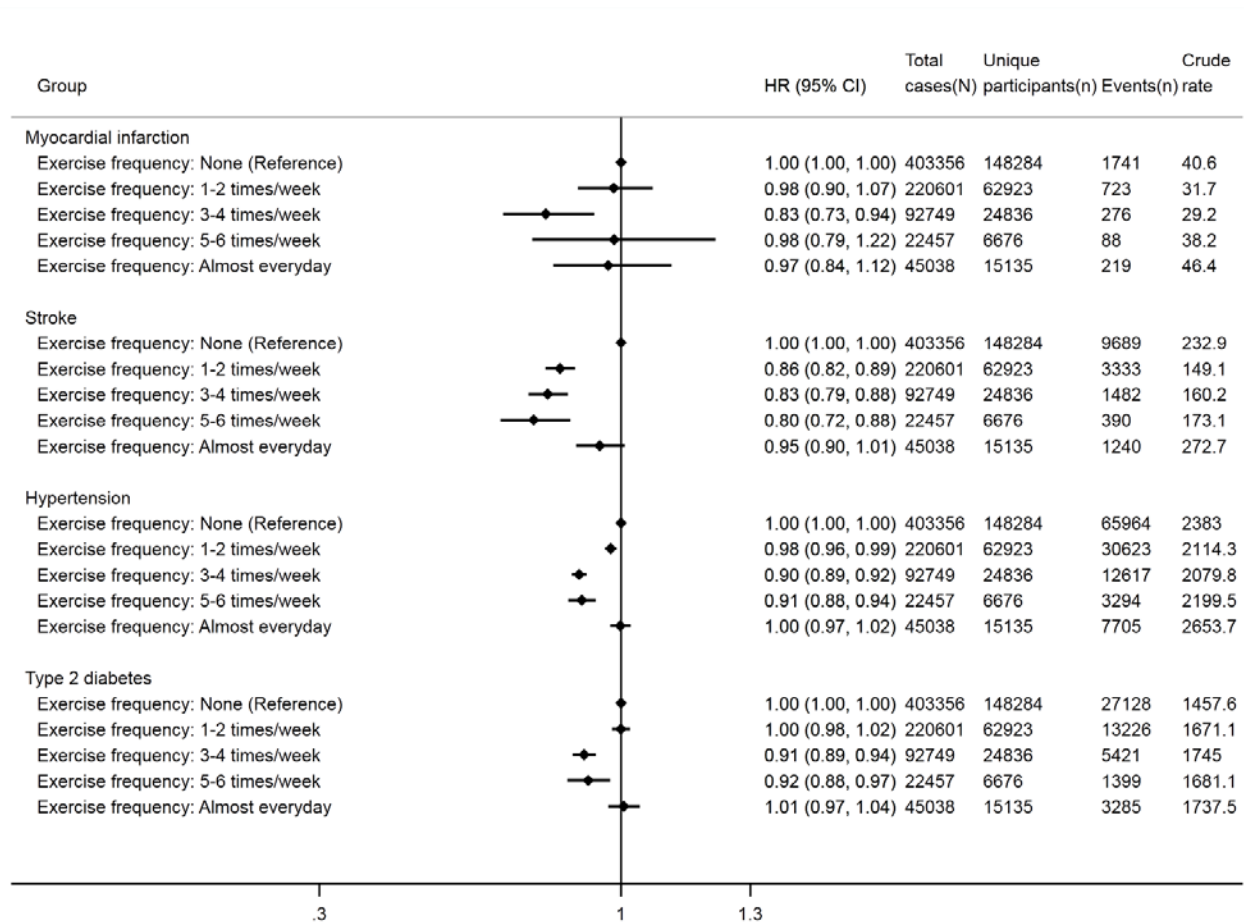

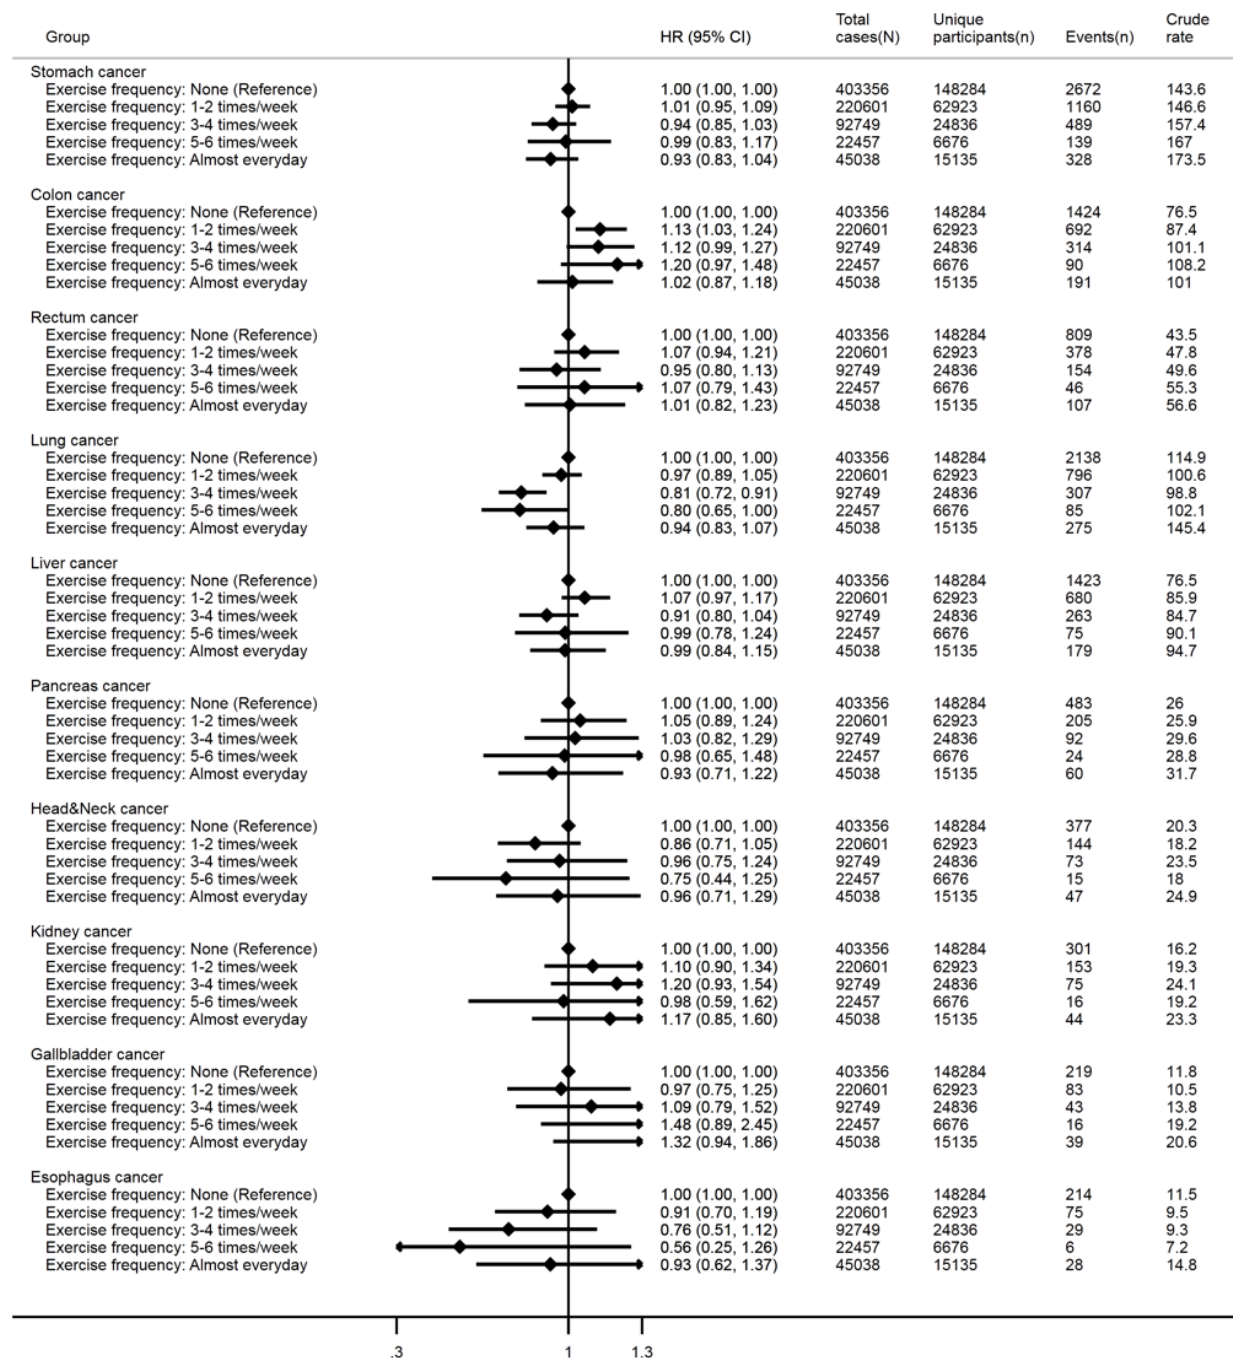

Supplementary Figure 2. Associations of exercise with incident myocardial infarction, stroke, hypertension and Type 2 diabetes (top panel) and various incident cancer outcomes (bottom panel). Note: Cox regression models using age as the underlying timescale were not adjusted for any confounders. Crude rates are per 100,000 person-years. “N” indicates numbers of total observations (i.e. participants who provided repeated measures are treated as separate observations) and “n” indicates numbers of unique participants at baseline. Abbreviations: HR – Hazard Ratio; CI – Confidence Intervals

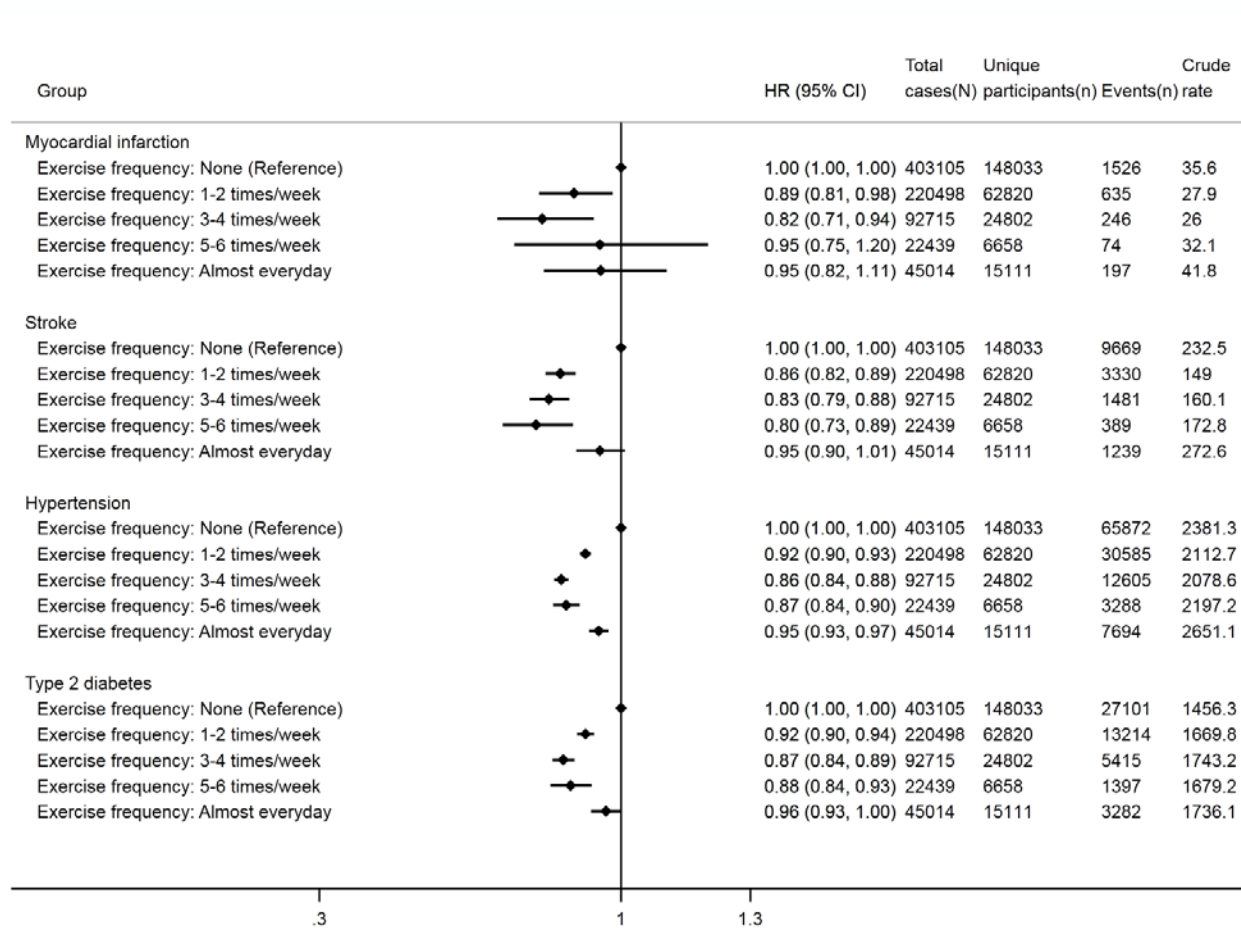

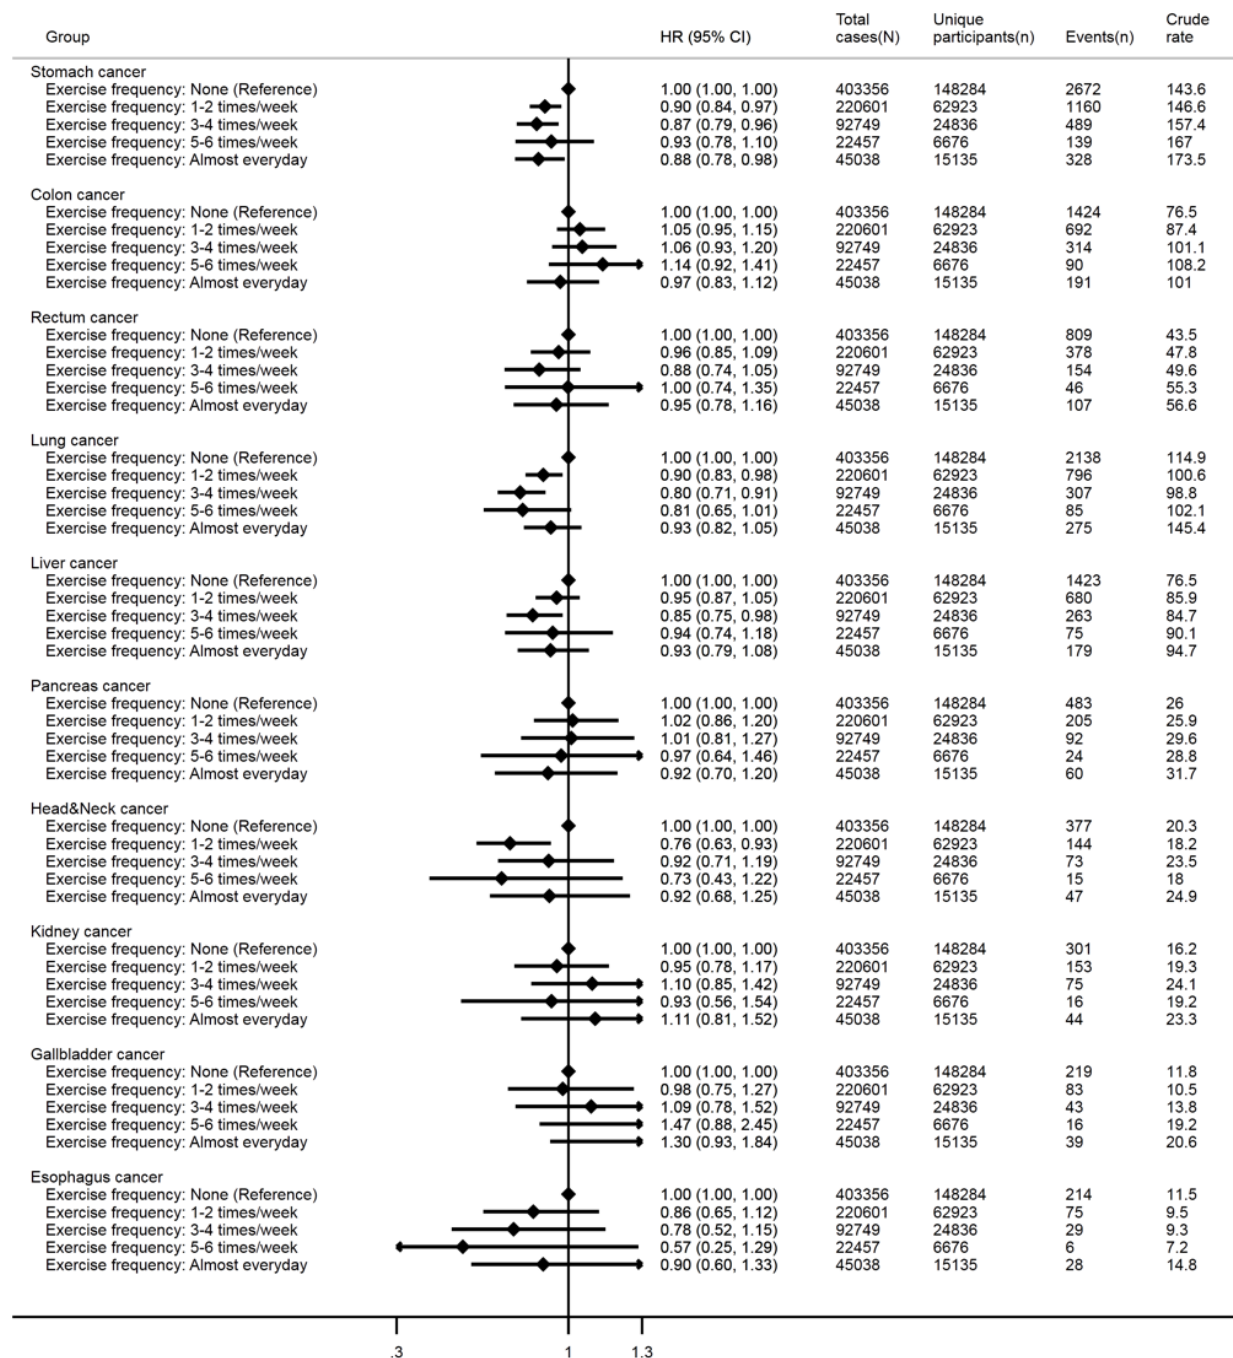

Supplementary Figure 3. Associations of exercise with incident myocardial infarction, stroke, hypertension and Type 2 diabetes (top panel) and various incident cancer outcomes (bottom panel) after excluding data from the first 2-year follow-up period. Note: Cox regression models using age as the underlying timescale were adjusted for sex, body mass index, systolic blood pressure, fasting glucose levels, total cholesterol levels, family history of heart disease, stroke or hypertension (in models for incident myocardial infarction, stroke and hypertension), diabetes (in models for incident Type 2 diabetes) or cancer (in models for incident cancer outcomes), smoking status and alcohol consumption. Crude rates are per 100,000 person-years. “N”

indicates numbers of total observations (i.e. participants who provided repeated measures are treated as separate observations) and “n” indicates numbers of unique participants at baseline. Abbreviations: HR – Hazard Ratio; CI – Confidence Intervals

## Body Mass Index <25 kg/m<sup>2</sup>

| Group                                | HR (95% CI)       | Total cases(N) | Unique participants(n) | Events(n) | Crude rate |
|--------------------------------------|-------------------|----------------|------------------------|-----------|------------|
| <b>Myocardial infarction</b>         |                   |                |                        |           |            |
| Exercise frequency: None (Reference) | 1.00 (1.00, 1.00) | 295683         | 108755                 | 1181      | 37.5       |
| Exercise frequency: 1-2 times/week   | 0.94 (0.84, 1.04) | 156729         | 44670                  | 487       | 30         |
| Exercise frequency: 3-4 times/week   | 0.75 (0.63, 0.88) | 65633          | 17543                  | 163       | 24.4       |
| Exercise frequency: 5-6 times/week   | 1.16 (0.91, 1.49) | 16000          | 4704                   | 66        | 40.3       |
| Exercise frequency: Almost everyday  | 0.99 (0.84, 1.17) | 31821          | 10658                  | 150       | 45         |
| <b>Stroke</b>                        |                   |                |                        |           |            |
| Exercise frequency: None (Reference) | 1.00 (1.00, 1.00) | 295683         | 108755                 | 6877      | 225.1      |
| Exercise frequency: 1-2 times/week   | 0.85 (0.81, 0.89) | 156729         | 44670                  | 2227      | 139.9      |
| Exercise frequency: 3-4 times/week   | 0.82 (0.77, 0.88) | 65633          | 17543                  | 990       | 151.2      |
| Exercise frequency: 5-6 times/week   | 0.82 (0.73, 0.93) | 16000          | 4704                   | 272       | 169.6      |
| Exercise frequency: Almost everyday  | 0.94 (0.87, 1.01) | 31821          | 10658                  | 842       | 262.2      |
| <b>Hypertension</b>                  |                   |                |                        |           |            |
| Exercise frequency: None (Reference) | 1.00 (1.00, 1.00) | 295683         | 108755                 | 44055     | 2061       |
| Exercise frequency: 1-2 times/week   | 0.92 (0.91, 0.94) | 156729         | 44670                  | 19638     | 1796.3     |
| Exercise frequency: 3-4 times/week   | 0.85 (0.83, 0.87) | 65633          | 17543                  | 7967      | 1745       |
| Exercise frequency: 5-6 times/week   | 0.86 (0.82, 0.90) | 16000          | 4704                   | 2079      | 1838.9     |
| Exercise frequency: Almost everyday  | 0.95 (0.92, 0.98) | 31821          | 10658                  | 4984      | 2296.9     |
| <b>Type 2 diabetes</b>               |                   |                |                        |           |            |
| Exercise frequency: None (Reference) | 1.00 (1.00, 1.00) | 295683         | 108755                 | 17229     | 613.2      |
| Exercise frequency: 1-2 times/week   | 0.93 (0.90, 0.95) | 156729         | 44670                  | 7975      | 552.4      |
| Exercise frequency: 3-4 times/week   | 0.88 (0.85, 0.92) | 65633          | 17543                  | 3291      | 548.3      |
| Exercise frequency: 5-6 times/week   | 0.88 (0.82, 0.95) | 16000          | 4704                   | 844       | 575.7      |
| Exercise frequency: Almost everyday  | 0.99 (0.95, 1.04) | 31821          | 10658                  | 2044      | 697.4      |

## Body Mass Index ≥25 kg/m<sup>2</sup>

| HR (95% CI)                  | Total cases(N) | Unique participants(n) | Events(n) | Crude rate |
|------------------------------|----------------|------------------------|-----------|------------|
| <b>Myocardial infarction</b> |                |                        |           |            |
| 1.00 (1.00, 1.00)            | 107673         | 39529                  | 560       | 49         |
| 0.77 (0.66, 0.90)            | 63872          | 18253                  | 236       | 35.8       |
| 0.87 (0.71, 1.07)            | 27116          | 7293                   | 113       | 40.9       |
| 0.68 (0.44, 1.04)            | 6457           | 1972                   | 22        | 33         |
| 0.87 (0.67, 1.11)            | 13217          | 4477                   | 69        | 49.8       |
| <b>Stroke</b>                |                |                        |           |            |
| 1.00 (1.00, 1.00)            | 107673         | 39529                  | 2812      | 254.4      |
| 0.89 (0.83, 0.96)            | 63872          | 18253                  | 1106      | 171.8      |
| 0.86 (0.78, 0.95)            | 27116          | 7293                   | 492       | 182        |
| 0.78 (0.65, 0.94)            | 6457           | 1972                   | 118       | 181.7      |
| 0.99 (0.89, 1.10)            | 13217          | 4477                   | 398       | 298.1      |
| <b>Hypertension</b>          |                |                        |           |            |
| 1.00 (1.00, 1.00)            | 107673         | 39529                  | 21909     | 3474.6     |
| 0.93 (0.90, 0.95)            | 63872          | 18253                  | 10985     | 3093.3     |
| 0.91 (0.88, 0.94)            | 27116          | 7293                   | 4650      | 3098.2     |
| 0.92 (0.87, 0.98)            | 6457           | 1972                   | 1215      | 3310.1     |
| 0.98 (0.94, 1.02)            | 13217          | 4477                   | 2721      | 3709.4     |
| <b>Type 2 diabetes</b>       |                |                        |           |            |
| 1.00 (1.00, 1.00)            | 107673         | 39529                  | 9899      | 1031.5     |
| 0.92 (0.89, 0.95)            | 63872          | 18253                  | 5251      | 947.9      |
| 0.86 (0.82, 0.91)            | 27116          | 7293                   | 2130      | 910.9      |
| 0.90 (0.83, 0.98)            | 6457           | 1972                   | 555       | 986.6      |
| 0.95 (0.90, 1.01)            | 13217          | 4477                   | 1241      | 1069.5     |

.3

1

1.3

1

1.3



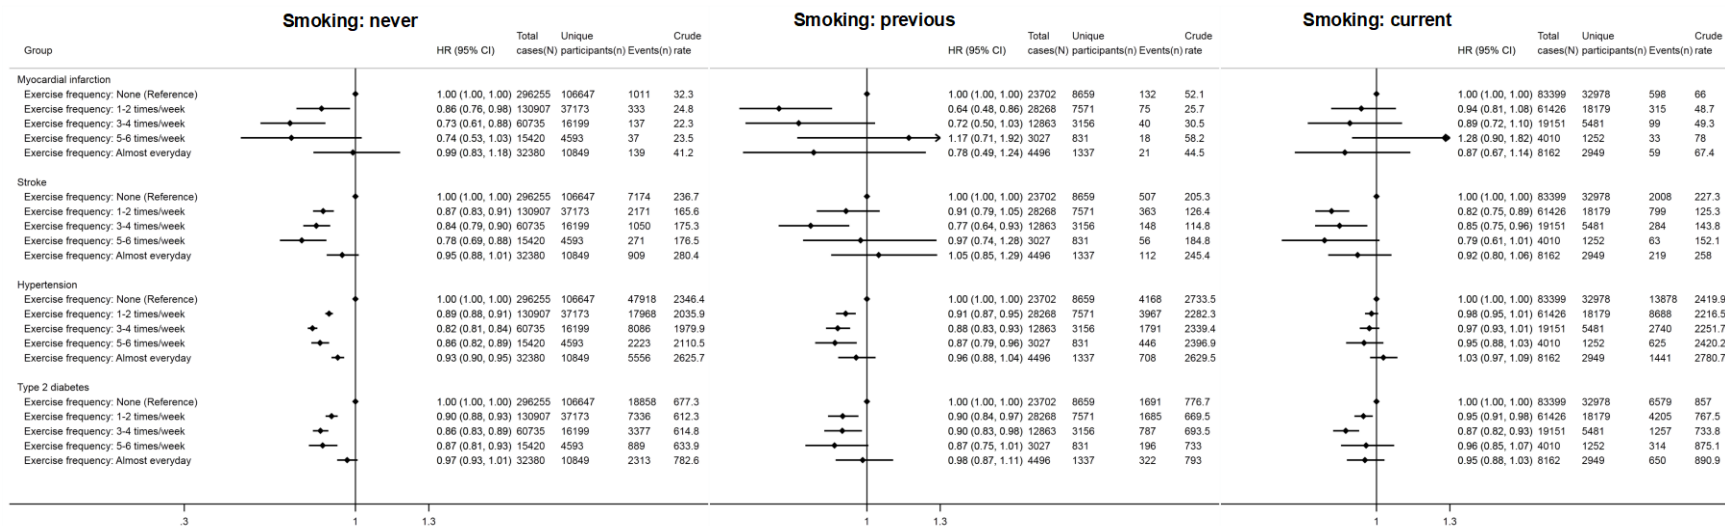

### Alcohol consumption: never

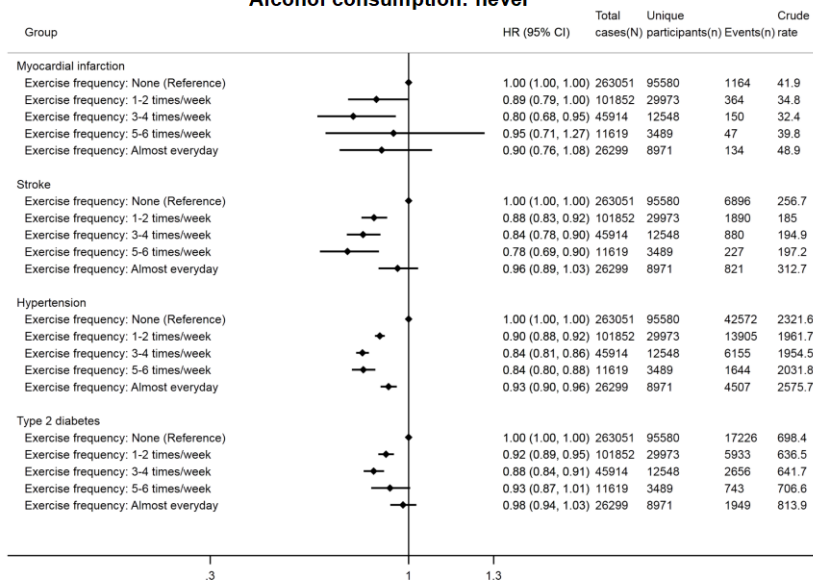

### Alcohol consumption: 2-3times/month

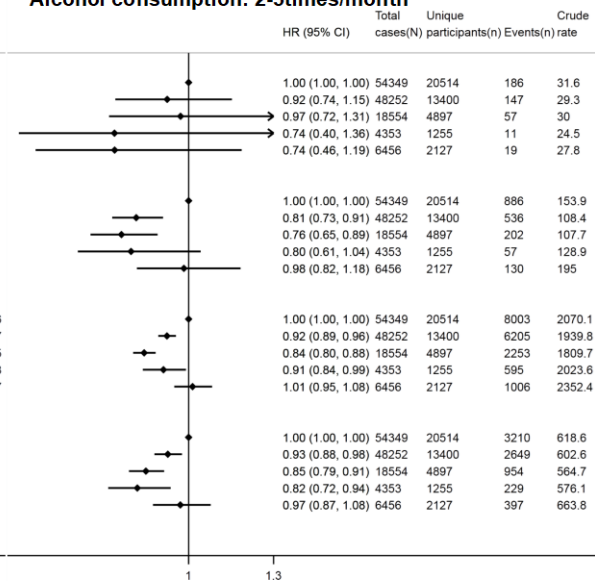

### Alcohol consumption: 1-2times/week

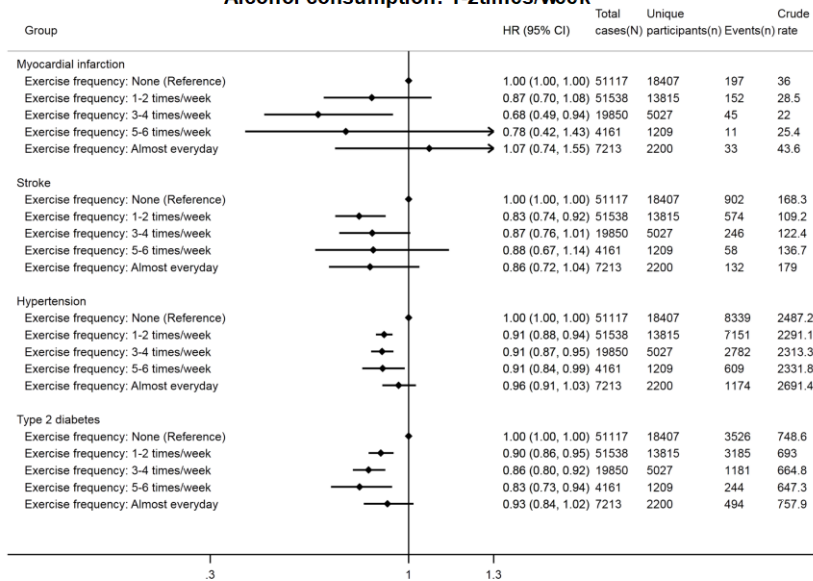

### Alcohol consumption: ≥3times/week

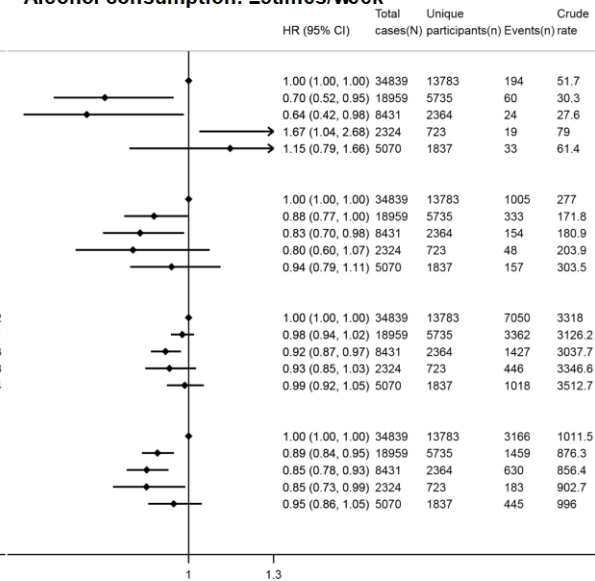



### No family history of CVD

### Family history of CVD

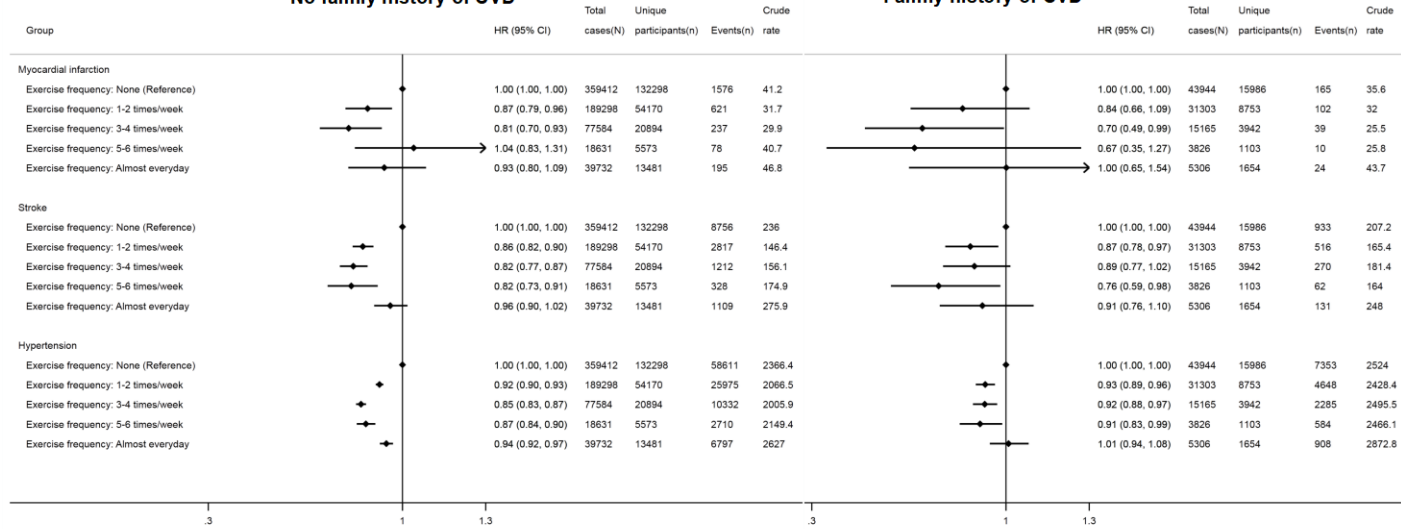

### No family history of diabetes

### Family history of diabetes

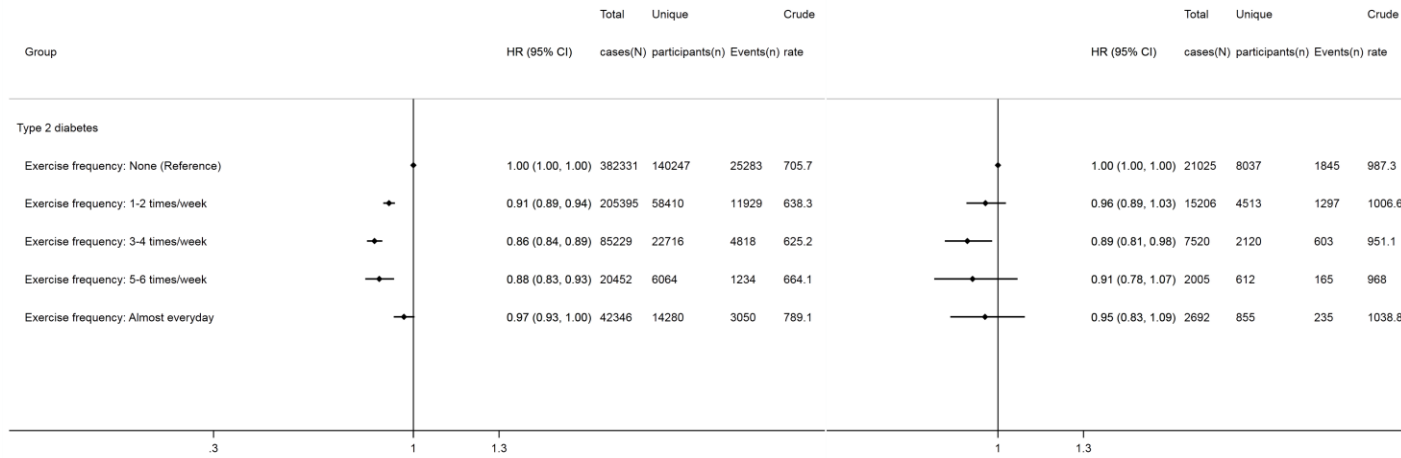

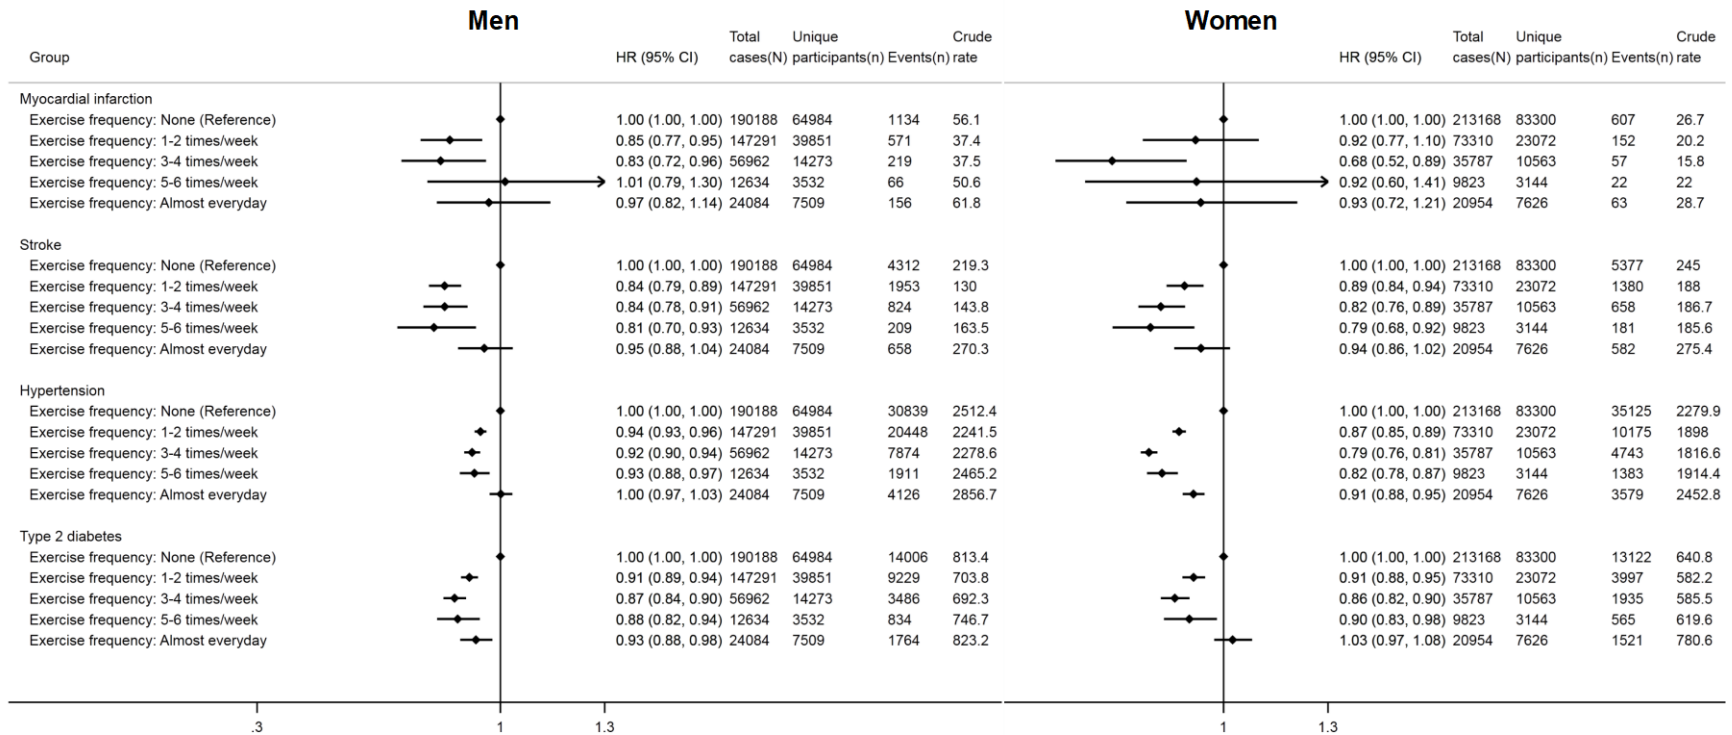

Supplementary Figure 4. Results from running Cox regression models examining effect modification of sex, body mass index, smoking, alcohol consumption, and family history of disease in the associations between exercise frequency and incident myocardial infarction, stroke, hypertension and type 2 diabetes. Note: Cox regression models using age as the underlying timescale were adjusted for sex [not in models for effect modification by sex], body mass index [not in models for effect modification by body mass index], systolic blood pressure, fasting glucose levels, total cholesterol levels, family history [not in models for effect modification by family history of respective disease] of heart disease/stroke/hypertension (in models for myocardial infarction, stroke and hypertension), or diabetes (in models for Type 2 diabetes), smoking status [not in models for effect modification by smoking status] and alcohol consumption [not in models for effect modification by alcohol consumption]. Crude rates are per 100,000 person-years. “N” indicates numbers of total observations (i.e. participants who provided repeated measures are treated as separate observations) and “n” indicates numbers of unique participants at baseline. P-values for multiplicative terms – myocardial infarction (p-value = 0.235), stroke (p-value = 0.363), hypertension (p-value = 0.050) and type 2 diabetes (p-value = 0.196) by body mass index;

myocardial infarction (p-value = 0.643), stroke (p-value = 0.661), hypertension (p-value <0.001) and type 2 diabetes (p-value = 0.980) by smoking; myocardial infarction (p-value = 0.300), stroke (p-value = 0.607), hypertension (p-value <0.001) and type 2 diabetes (p-value = 0.081) by alcohol consumption; myocardial infarction (p-value = 0.590), stroke (p-value = 0.505), and hypertension (p-value = 0.029) by family history of cardiovascular disease; type 2 diabetes (p-value = 0.952) by family history of diabetes; and myocardial infarction (p-value = 0.334), stroke (p-value = 0.818), hypertension (p-value <0.001) and type 2 diabetes (p-value = 0.012) by sex. Abbreviations: HR – Hazard Ratio; CI – Confidence Intervals

## Body Mass Index <25 kg/m<sup>2</sup>

## Body Mass Index ≥25 kg/m<sup>2</sup>

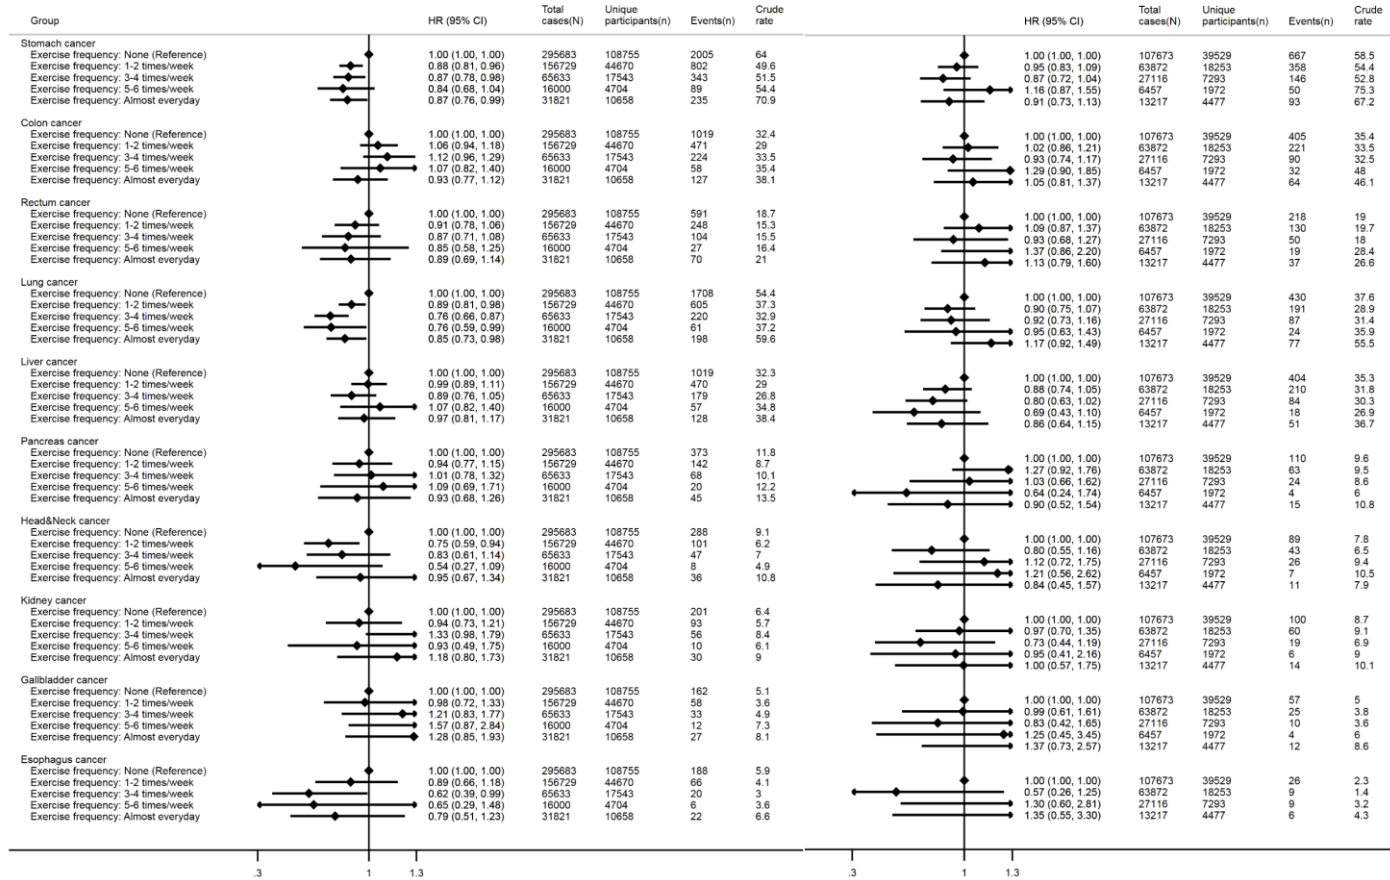

## Smoking: never

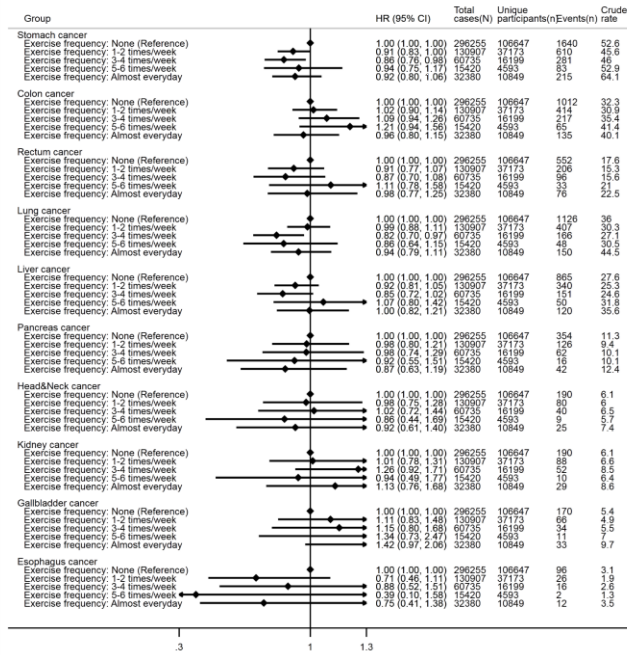

## Smoking: previous

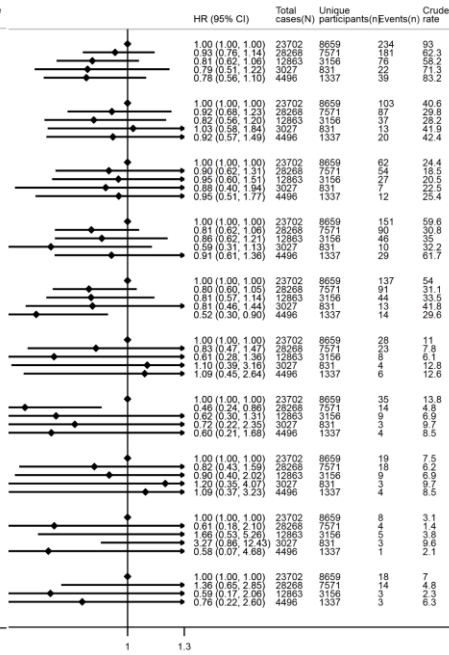

## Smoking: current

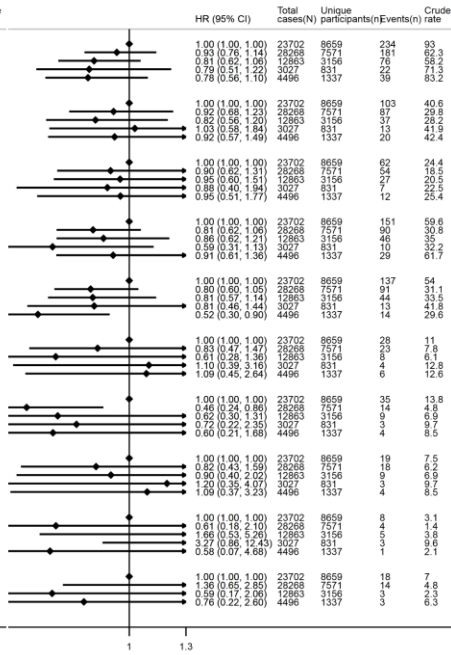

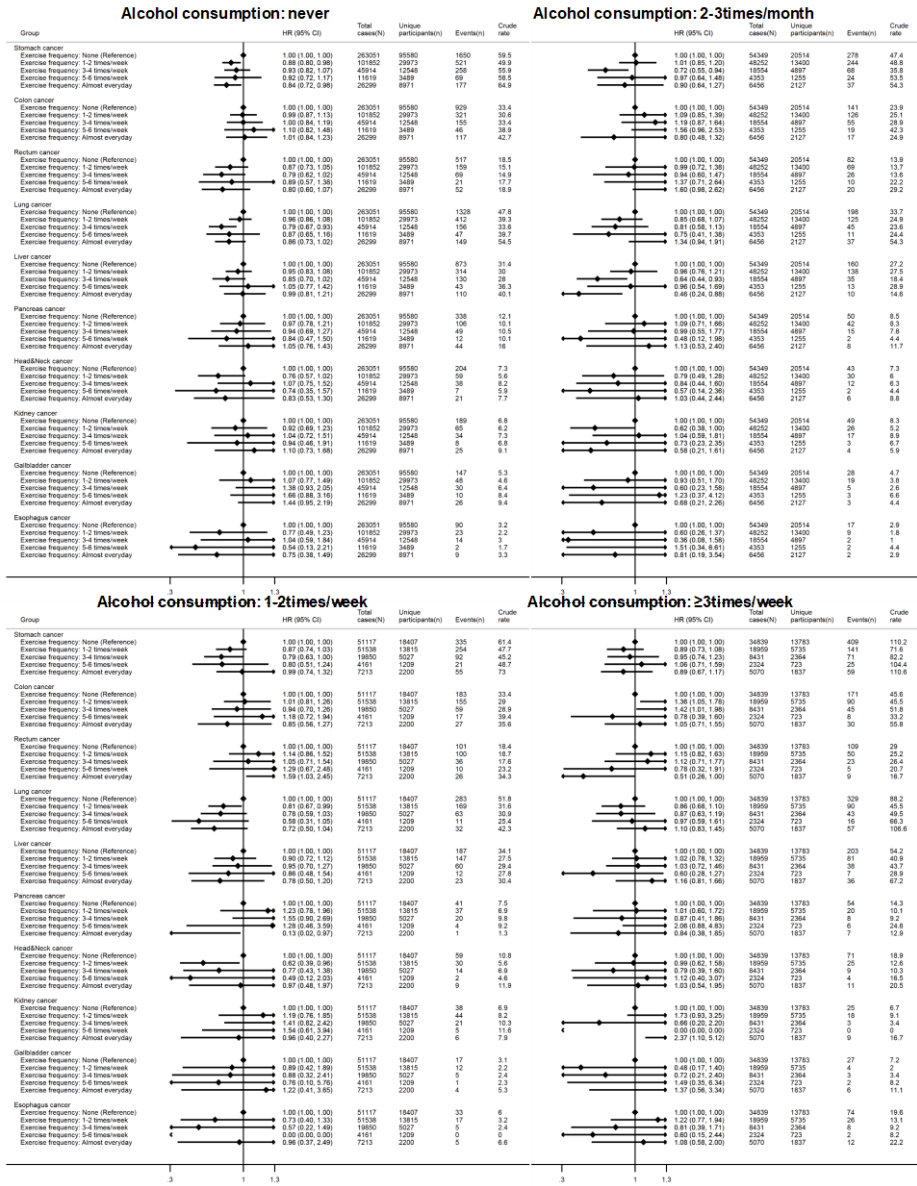



## No family history of cancer

## Family history of cancer

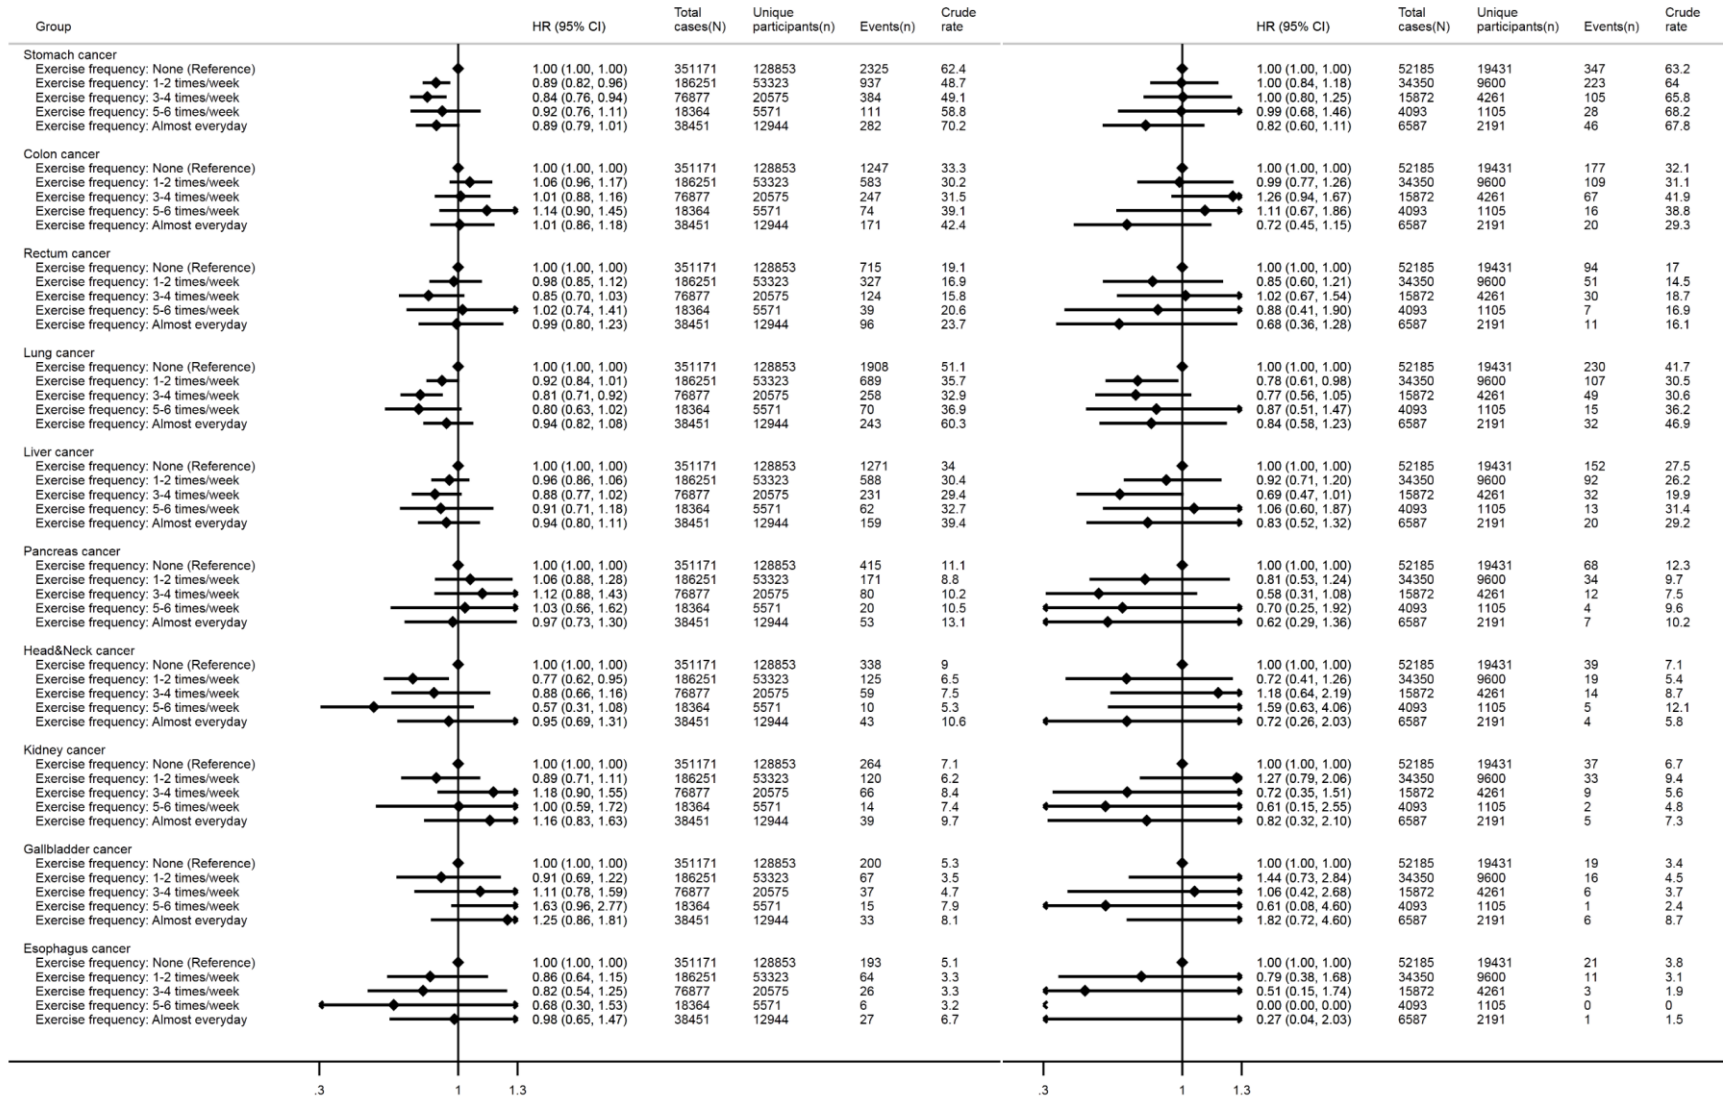

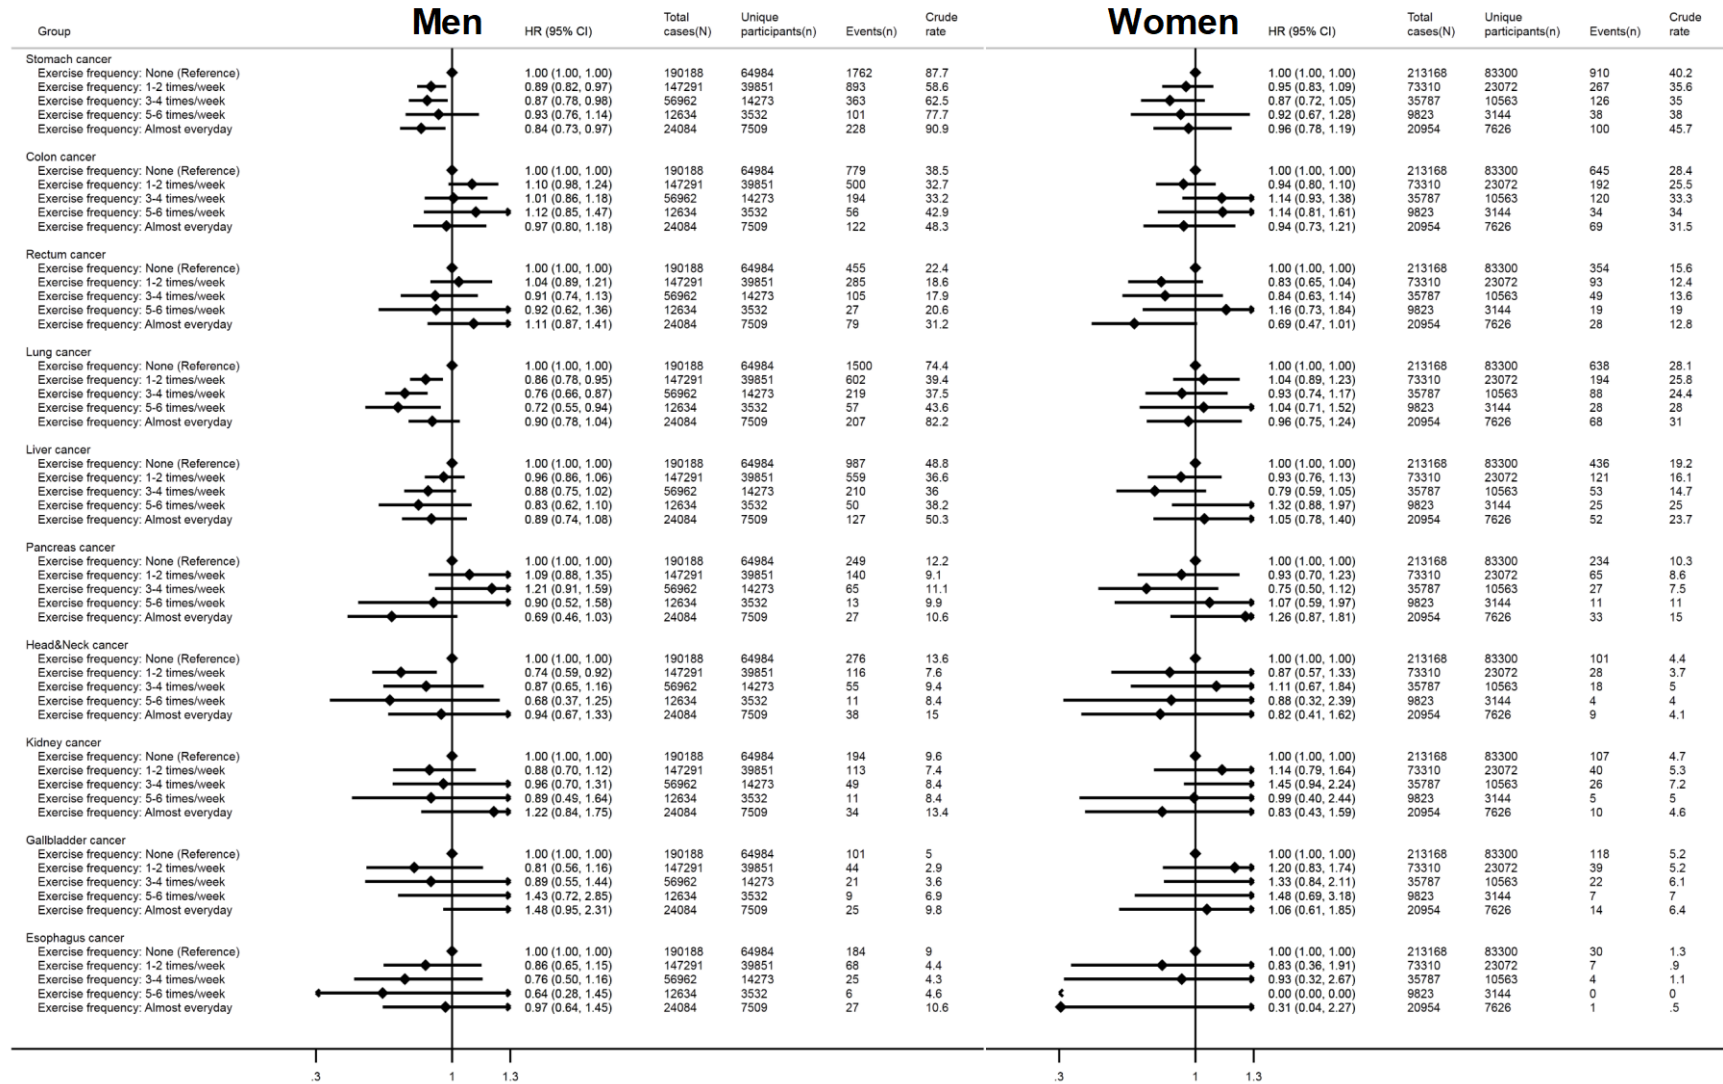

Supplementary Figure 5. Results from running Cox regression models examining effect modification of sex, body mass index, smoking, alcohol consumption, and family history of disease in the associations between exercise frequency and various incident cancer outcomes. Note: Cox regression models using age as the underlying timescale were adjusted for sex [not in models for effect



modification by sex], body mass index [not in models for effect modification by body mass index], systolic blood pressure, fasting glucose levels, total cholesterol levels, family history of cancer [not in models for effect modification by family history of cancer], smoking status [not in models for effect modification by smoking status] and alcohol consumption [not in models for effect modification by alcohol consumption]. Crude rates are per 100,000 person-years. “N” indicates numbers of total observations (i.e. participants who provided repeated measures are treated as separate observations) and “n” indicates numbers of unique participants at baseline. P-values for multiplicative terms – stomach cancer (p-value = 0.274), colon cancer (p-value = 0.640), rectum cancer (p-value = 0.107), lung cancer (p-value = 0.016), liver cancer (p-value = 0.129), pancreas cancer (p-value = 0.860), head & neck cancer (p-value = 0.488), kidney cancer (p-value = 0.285), gallbladder cancer (p-value = 0.970), and esophagus cancer (p-value = 0.263) by body mass index; stomach cancer (p-value = 0.699), colon cancer (p-value = 0.932), rectum cancer (p-value = 0.610), lung cancer (p-value = 0.492), liver cancer (p-value = 0.405), pancreas cancer (p-value = 0.338), head & neck cancer (p-value = 0.562), kidney cancer (p-value = 0.280), gallbladder cancer (p-value = 0.295), and esophagus cancer (p-value = 0.292) by smoking ; stomach cancer (p-value = 0.655), colon cancer (p-value = 0.977), rectum cancer (p-value = 0.433), lung cancer (p-value = 0.387), liver cancer (p-value = 0.704), pancreas cancer (p-value = 0.711), head & neck cancer (p-value = 1.000), kidney cancer (p-value = 0.336), gallbladder cancer (p-value = 0.350), and esophagus cancer (p-value = 0.550) by alcohol consumption ; stomach cancer (p-value = 0.996), colon cancer (p-value = 0.399), rectum cancer (p-value = 0.478), lung cancer (p-value = 0.427), liver cancer (p-value = 0.337), pancreas cancer (p-value = 0.086), head & neck cancer (p-value = 0.712), kidney cancer (p-value = 0.319), gallbladder cancer (p-value = 0.766), and esophagus cancer (p-value = 0.098) by family history of cancer; and stomach cancer (p-value = 0.405), colon cancer (p-value = 0.957), rectum cancer (p-value = 0.106), lung cancer (p-value = 0.063), liver cancer (p-value = 0.278), pancreas cancer (p-value = 0.265), head & neck cancer (p-value = 0.907), kidney cancer (p-value = 0.967), gallbladder cancer (p-value = 0.548), and esophagus cancer (p-value = 0.256) by sex. Abbreviations: HR – Hazard Ratio; CI – Confidence Intervals
